# Supplementary material
Source: Springer Nature journal article supplement (https://www.springermedizin.de/resource/supplementary/12931_2010_1046_MOESM4_ESM.pdf/9425522)

**A**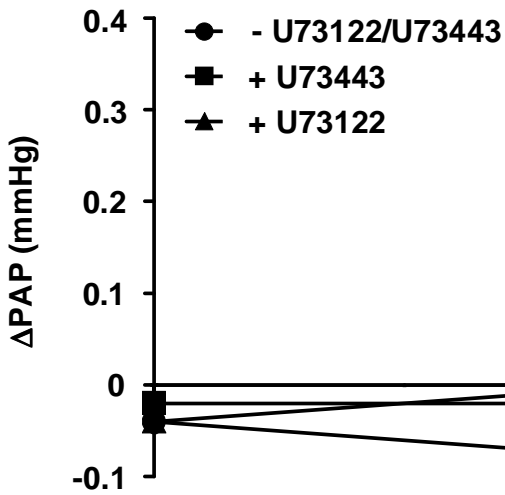

Maneuver no. 2

3

4

U73122/U73343 ( $\mu$ M) 0

2

3

**B**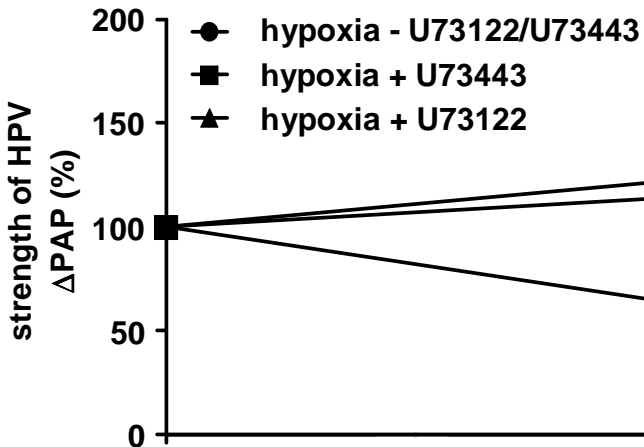

Maneuver no. 2

3

4

U73122/U73343 ( $\mu$ M) 0

2

3

**C**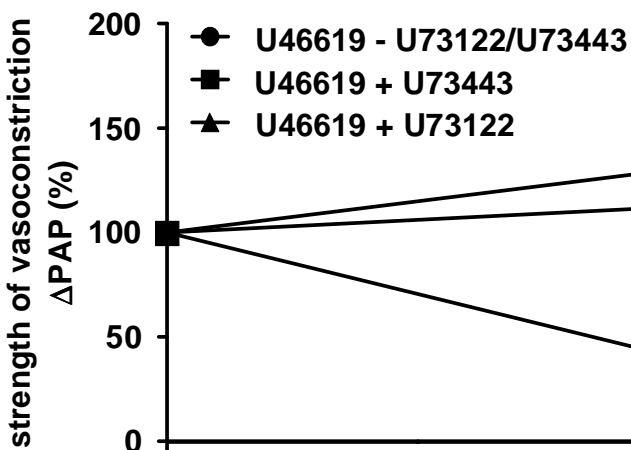

Maneuver no. 2

3

4

U73122/U73343 ( $\mu$ M) 0

2

3

Supplement: MOESM4 [file 9425522]
